# Supplementary material for: Nanoscale characterization of the biomolecular corona by cryo-electron microscopy, cryo-electron tomography, and image simulation
Source: PubMed Central journal article supplement (PMC7835367; doi:10.1038/s41467-020-20884-9), 2021-01-25
Supplement: 41467_2020_20884_MOESM1_ESM.pdf [file 41467_2020_20884_MOESM1_ESM.pdf]

## Supplementary Information

### Nanoscale Characterization of the Biomolecular Corona by Cryo-Electron

### Microscopy, Cryo-Electron Tomography, and Image Simulation

Sara Sheibani<sup>1\*,#</sup>, Kaustuv Basu<sup>2\*</sup>, Ali Farnudi<sup>3</sup>, Aliakbar Ashkarran<sup>5</sup>, Muneyoshi Ichikawa<sup>1</sup>, John F. Presley<sup>1</sup>, Khanh Huy Bui<sup>1,2</sup>, Mohammad Reza Ejtehad<sup>3,4,#</sup>, Hojatollah Vali<sup>1,2</sup>, and Morteza Mahmoudi<sup>5,#</sup>

<sup>1</sup>Department of Anatomy & Cell Biology, McGill University, Montreal, Quebec H3A 0C7, Canada

<sup>2</sup>Facility for Electron Microscopy Research, McGill University, Montreal, Quebec H3A 0C7, Canada

<sup>3</sup>Department of Physics, Sharif University of Technology, Tehran, Iran

<sup>4</sup>School of Nano Science, Institute for Research in Fundamental Sciences (IPM), Tehran, Iran

<sup>5</sup>Department of Radiology and Precision Health Program, College of Human Medicine, Michigan State University, East Lansing, USA

\* Co-authors

# Corresponding authors: (MRE) email: [ejtehad@sharif.edu](mailto:ejtehad@sharif.edu); (SS) email: [sara.sheibani@mcgill.ca](mailto:sara.sheibani@mcgill.ca); (MM) email: [mahmou22@msu.edu](mailto:mahmou22@msu.edu)

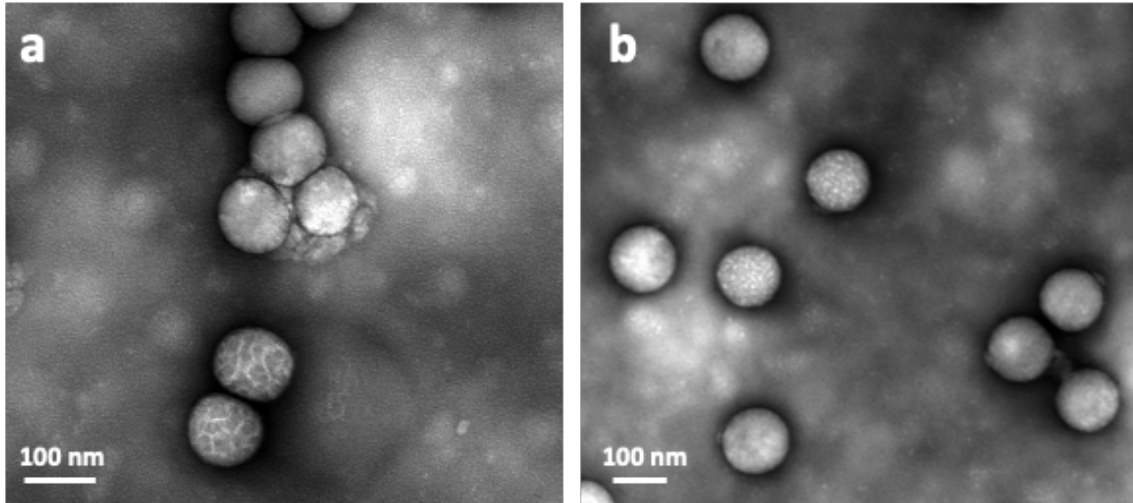

**Supplementary Figure 1.** (a) Protein corona (hard and soft) formation on the surface on nanoparticles (no wash) (b) hard protein corona formation on the surface of nanoparticle (with washing step).

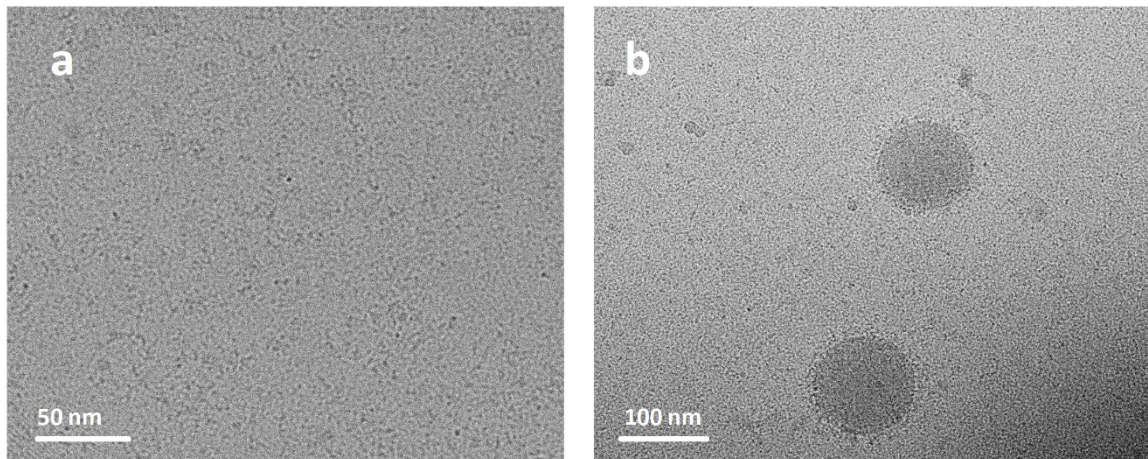

**Supplementary Figure 2.** Cryo-EM images of the PS-COOH NPs (a) original plasma diluted in Sorensen's phosphate buffer to 50%. There is little evidence for presence of large cluster and aggregate; (b) NPs with corona in 2% solution showing the distribution of biomolecules and their association with the surface of the NPs. Similar to the plasma, there is little evidence for large clusters.

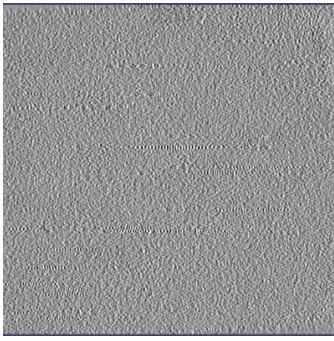

1

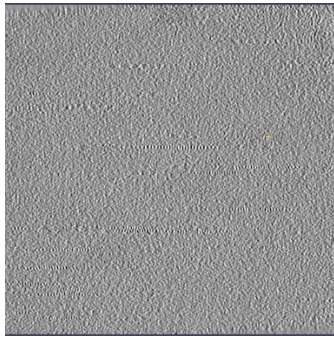

2

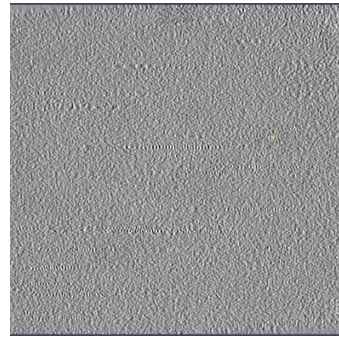

3

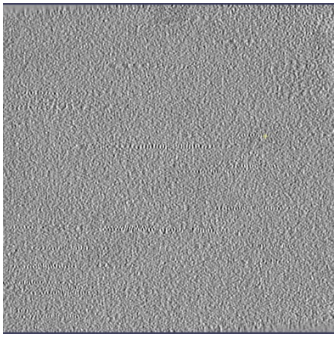

4

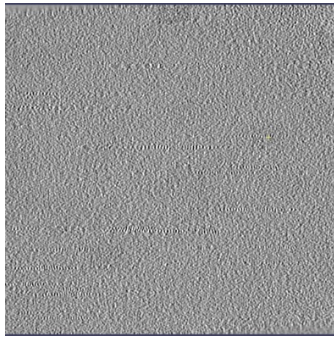

5

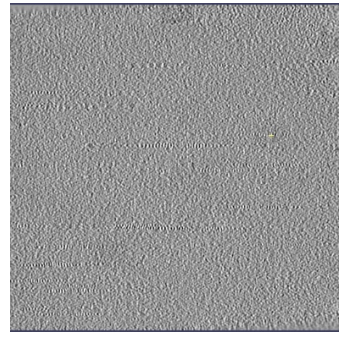

6

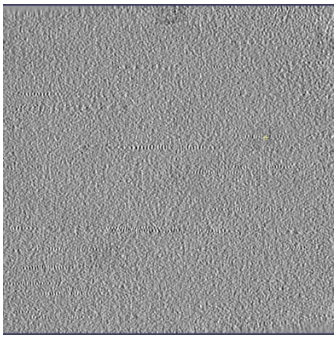

7

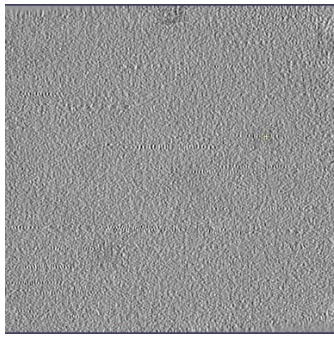

8

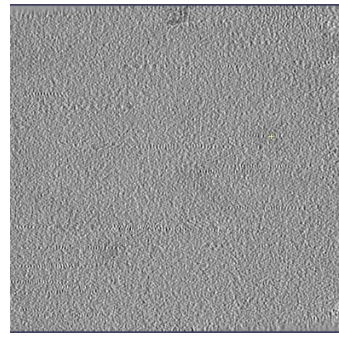

9

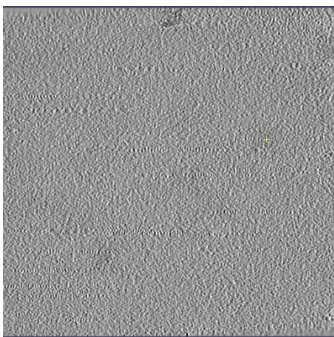

10

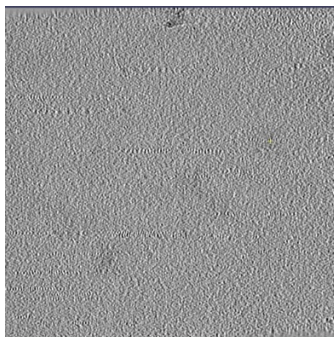

11

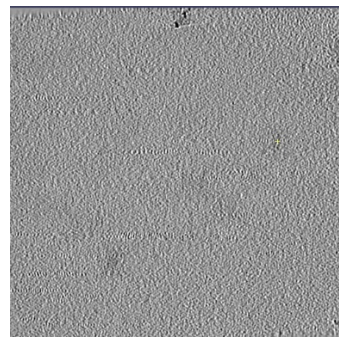

12

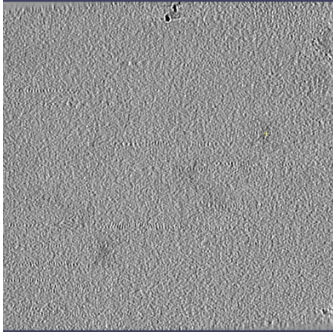

13

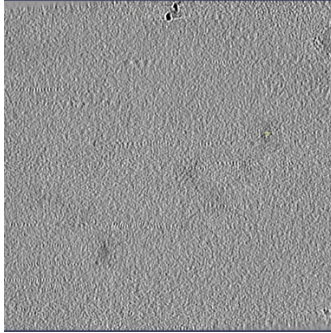

14

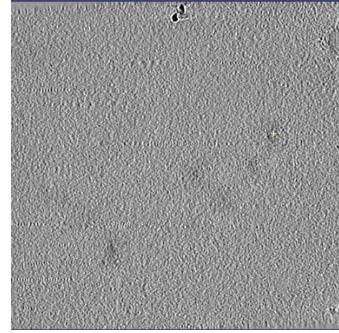

15

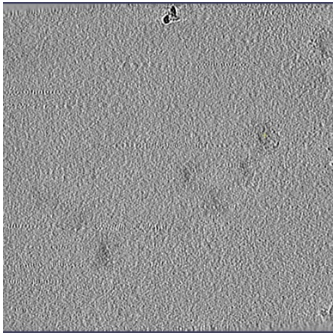

16

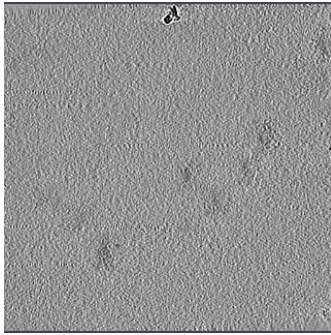

17

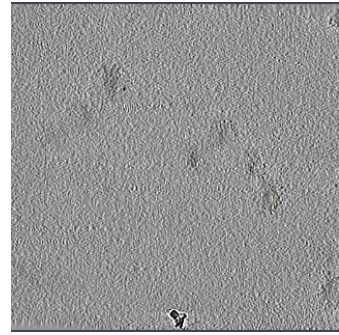

18

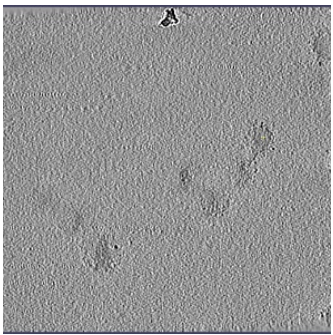

19

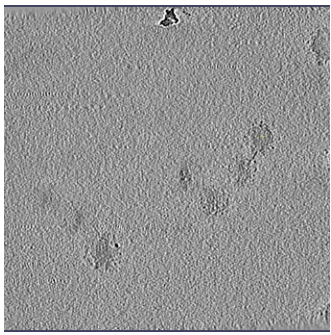

20

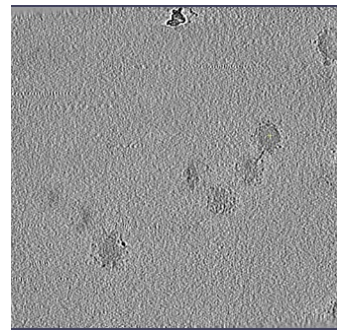

21

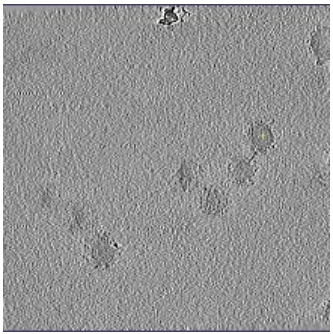

22

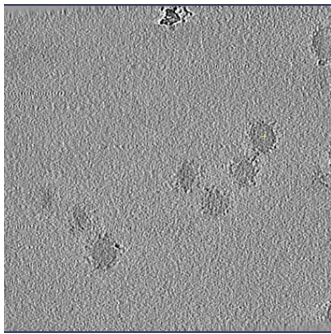

23

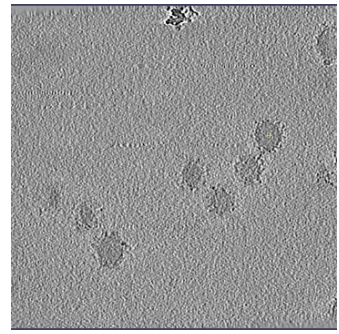

24

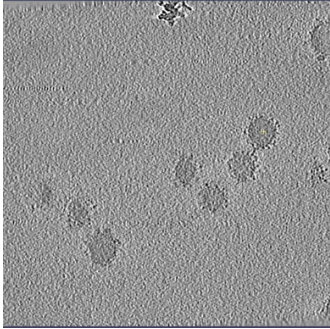

25

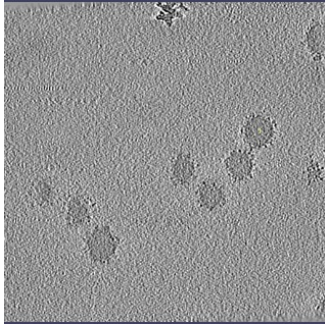

26

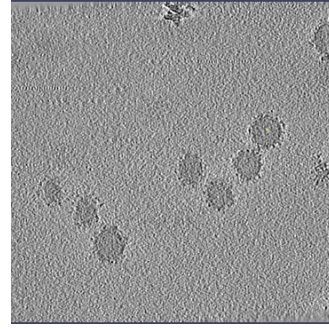

27

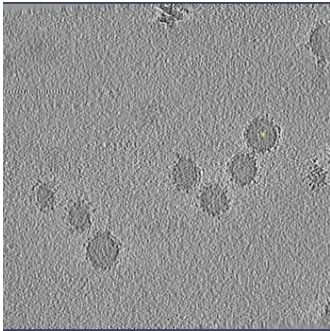

28

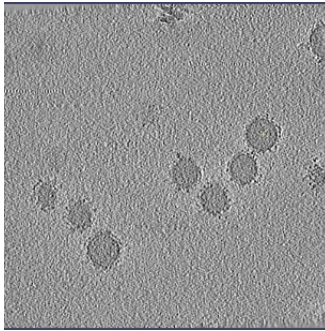

29

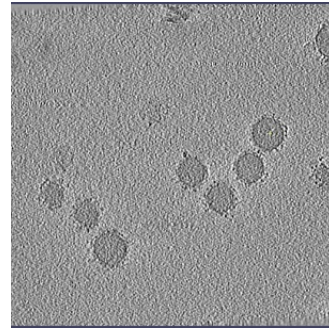

30

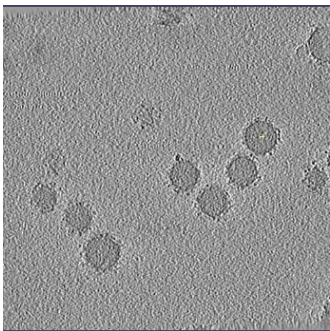

31

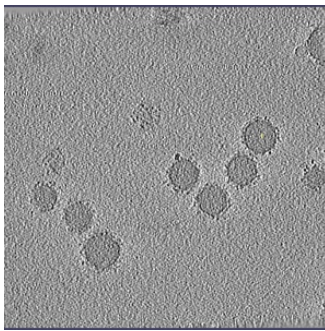

32

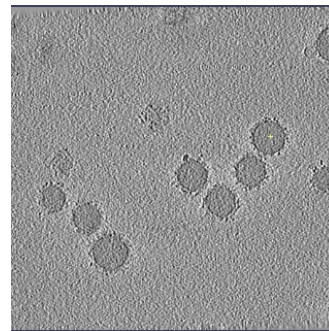

33

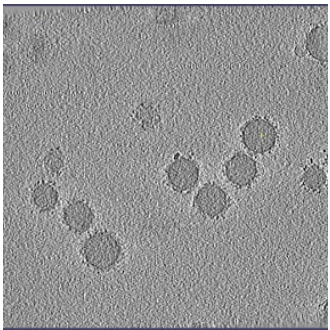

34

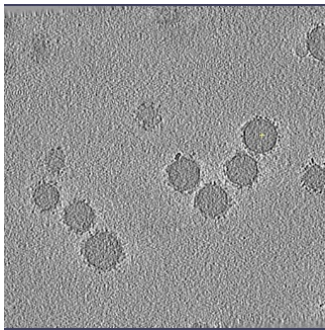

35

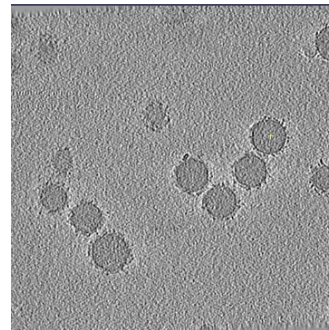

36

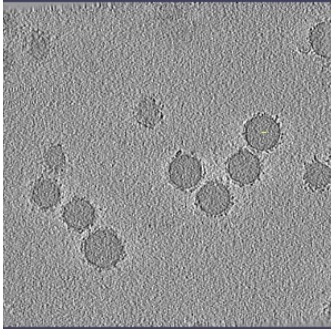

37

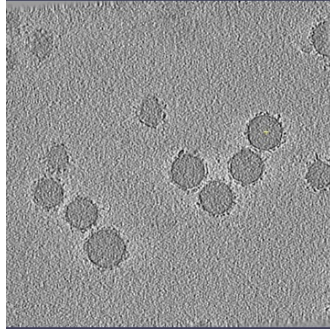

38

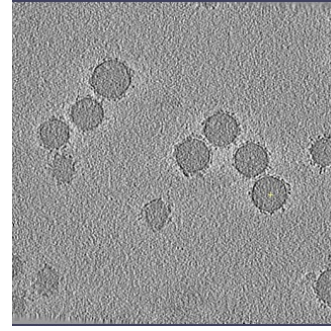

39

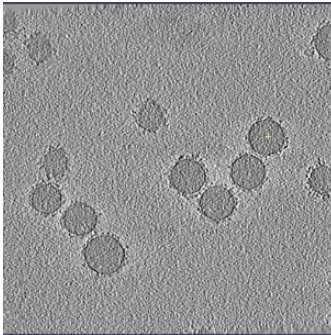

40

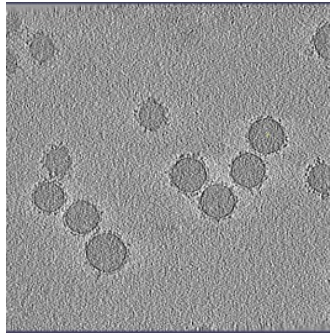

41

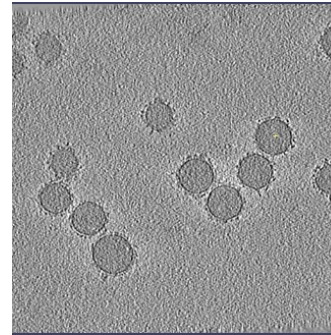

42

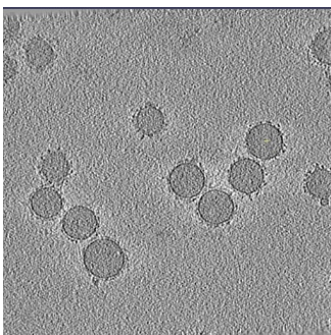

43

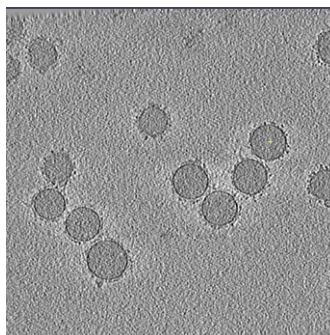

44

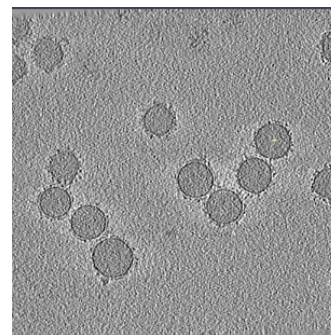

45

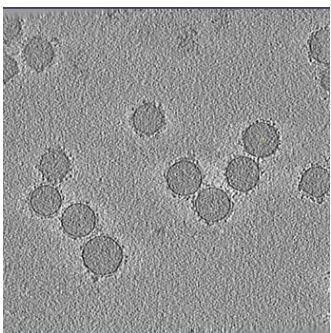

46

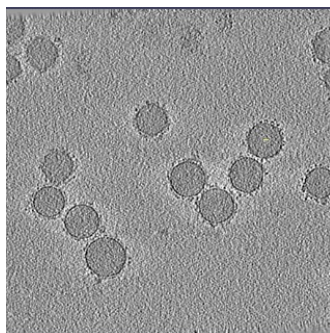

47

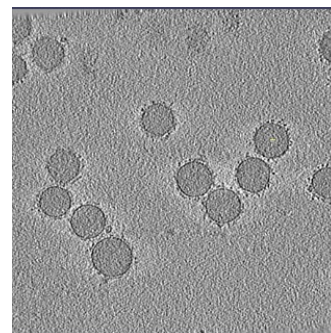

48

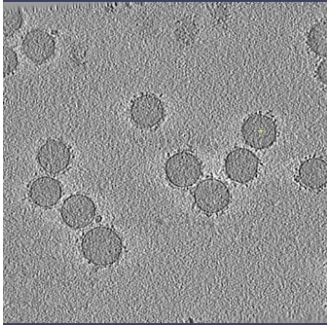

49

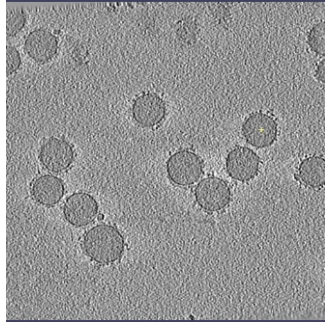

50

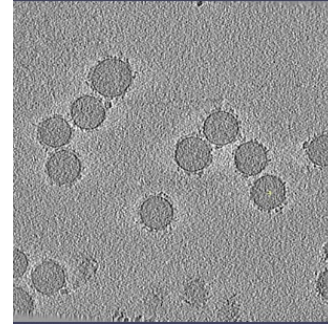

51

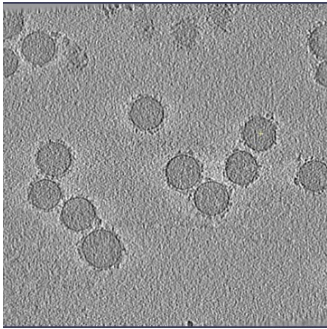

52

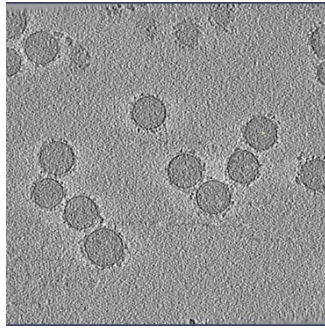

53

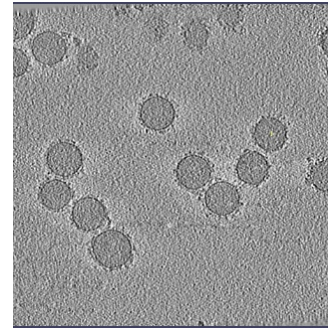

54

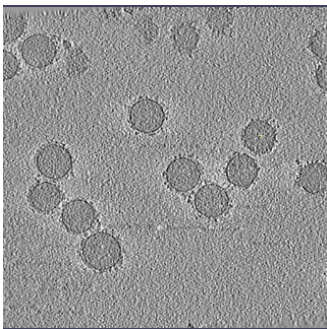

55

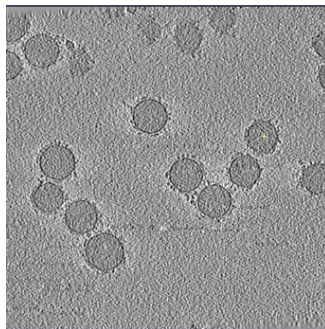

56

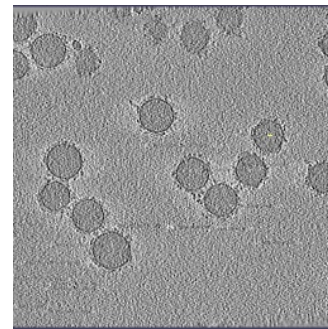

57

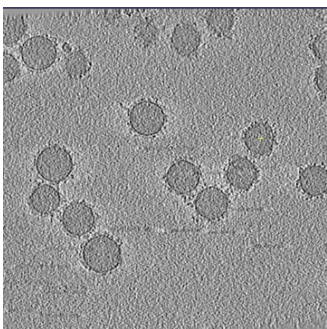

58

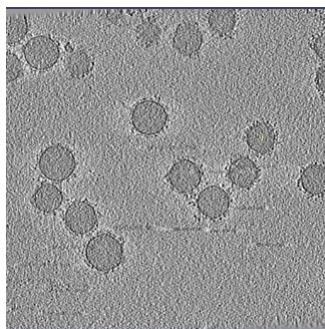

59

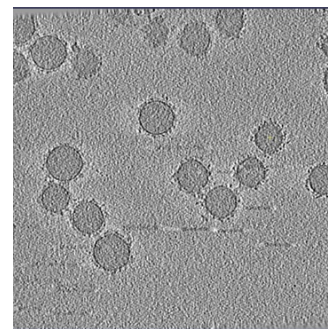

60

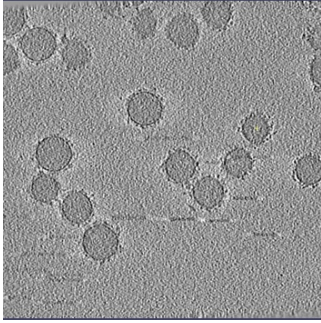

61

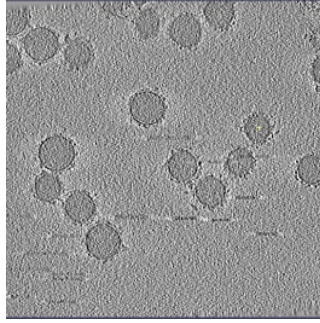

62

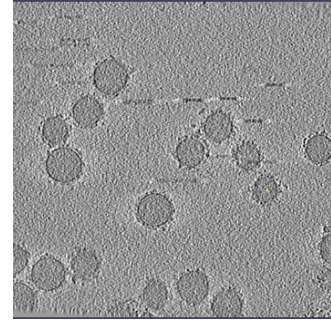

63

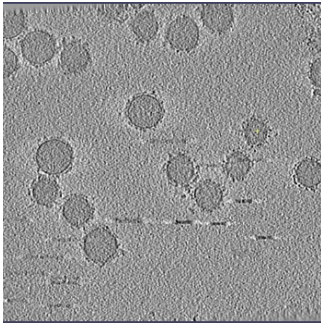

64

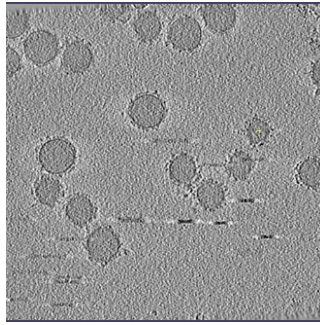

65

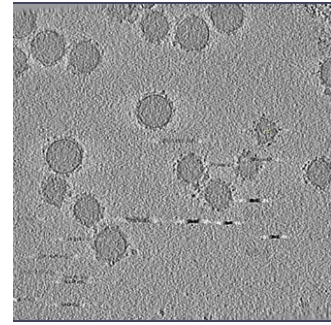

66

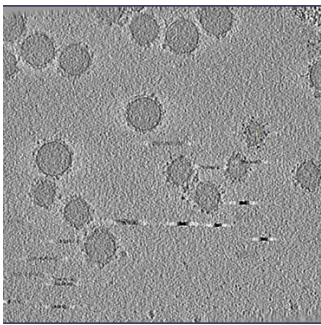

67

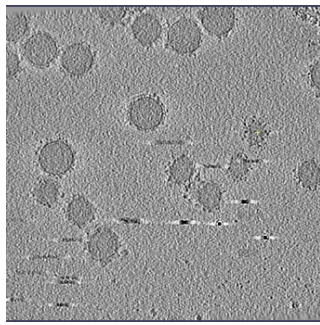

68

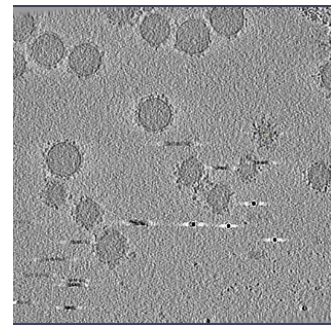

69

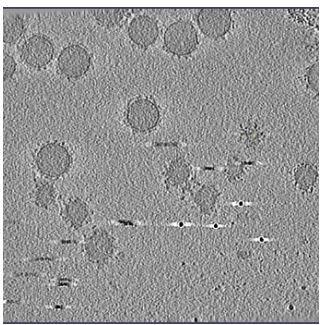

70

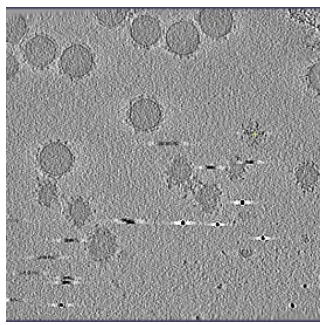

71

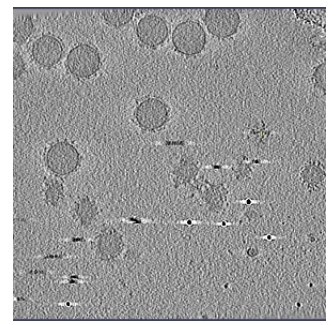

72



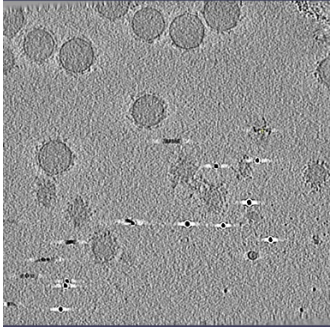

73

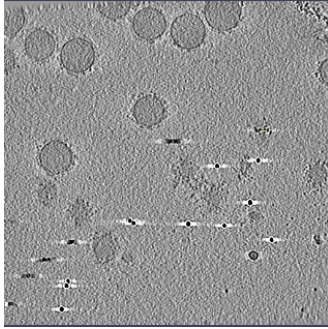

74

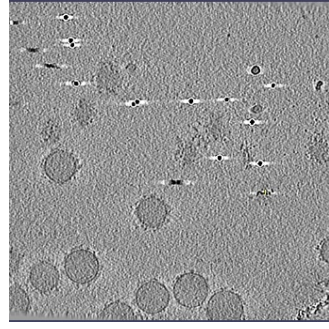

75

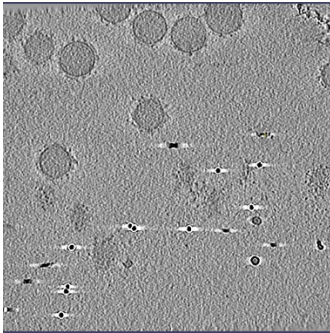

76

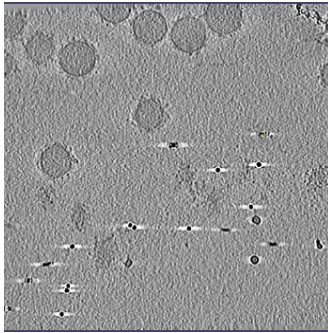

77

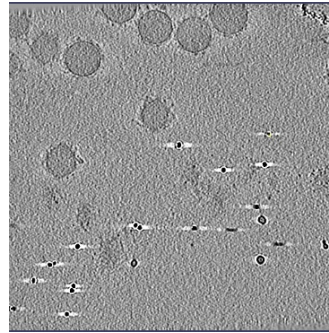

78

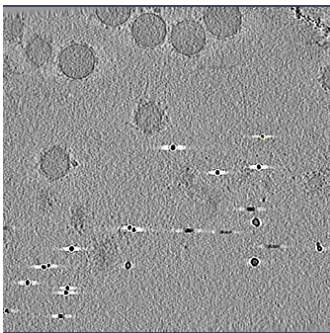

79

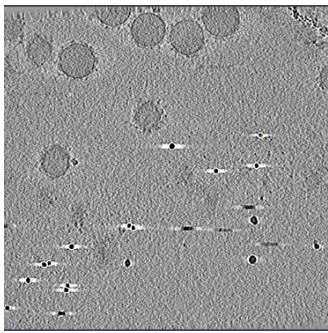

80

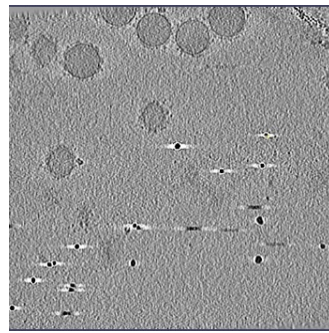

81

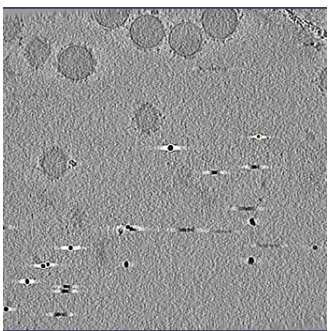

82

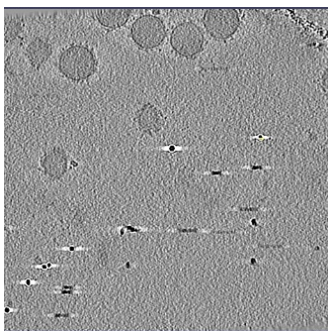

83

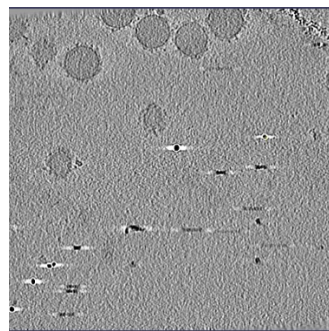

84

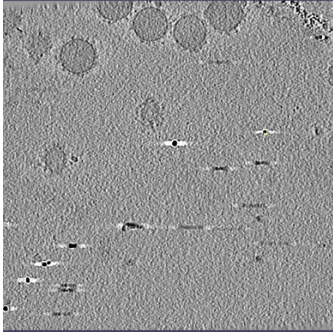

85

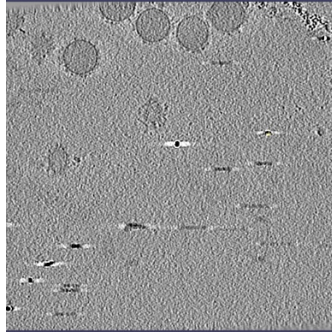

86

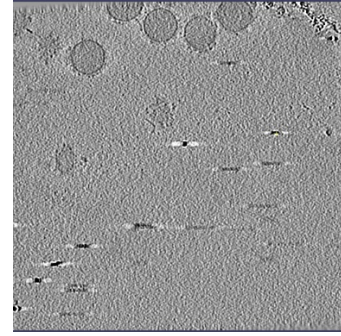

87

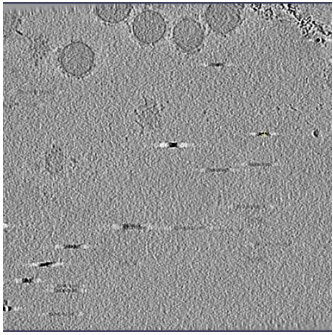

88

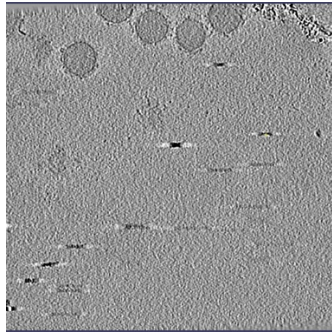

89

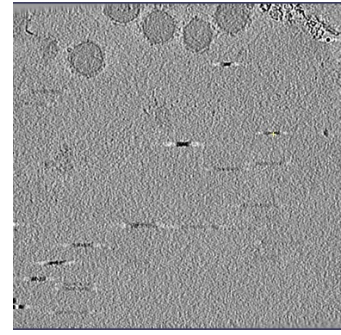

90

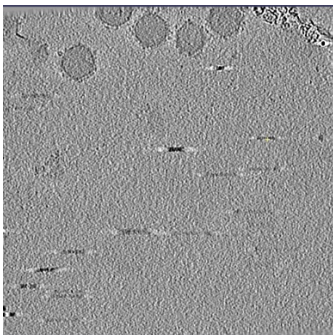

91

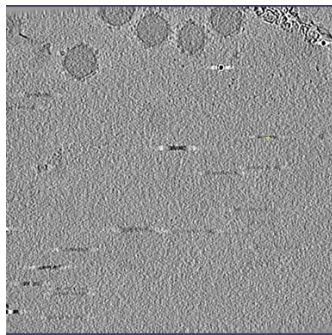

92

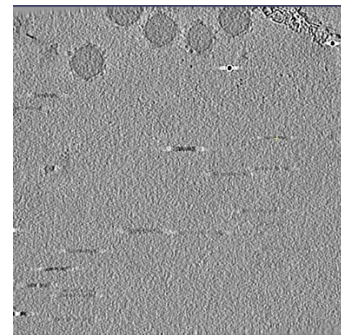

93

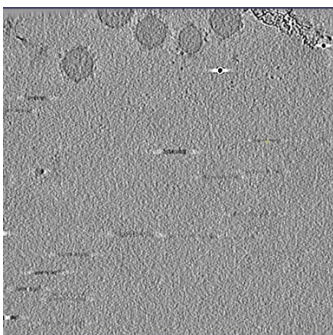

94

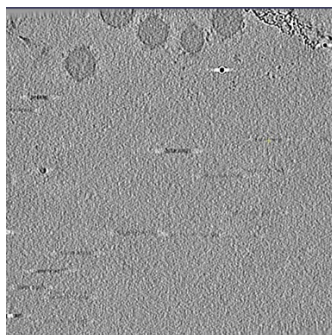

95

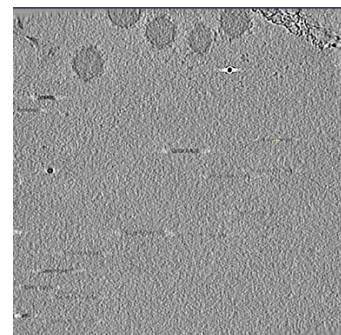

96

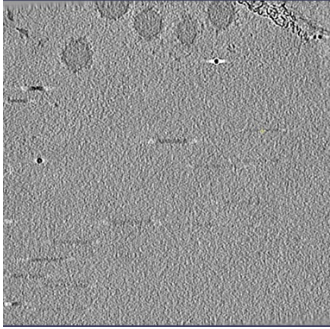

97

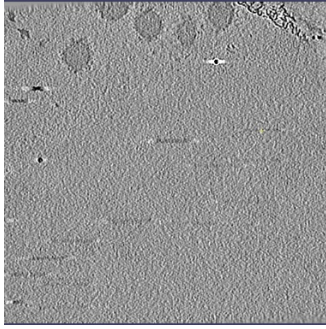

98

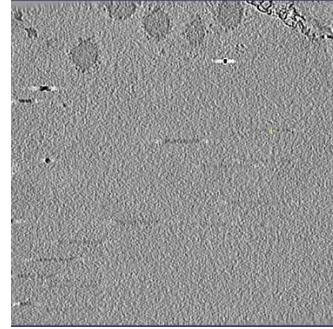

99

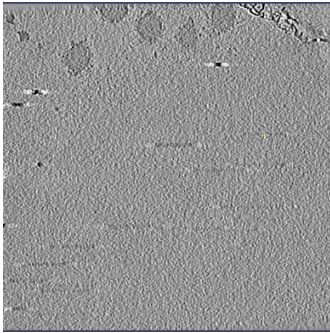

100

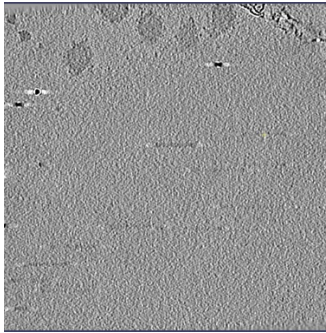

101

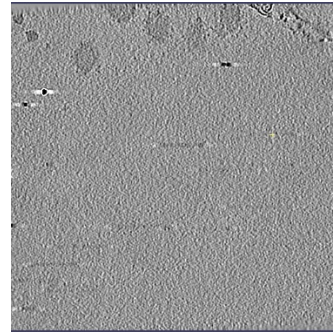

102

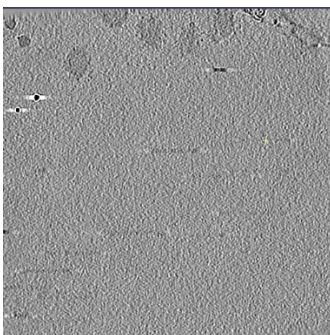

103

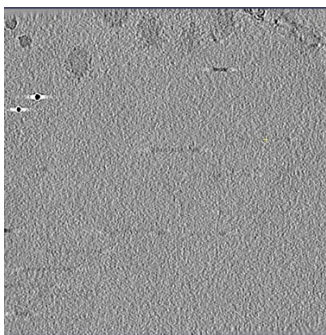

104

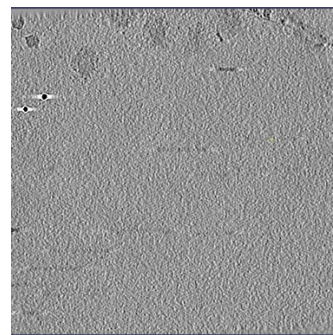

105

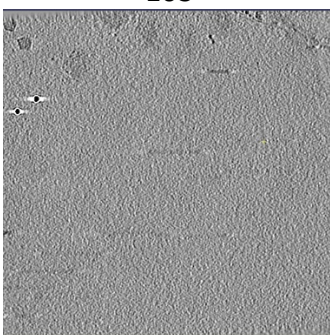

106

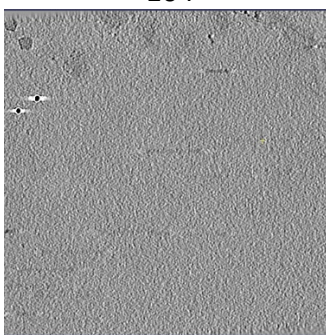

107

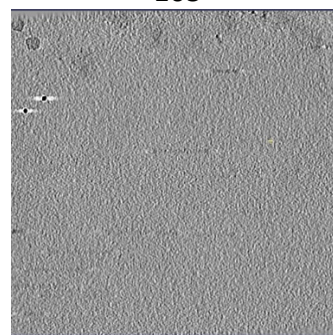

108

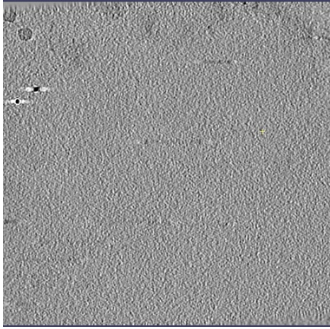

109

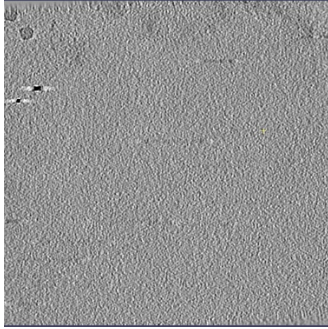

110

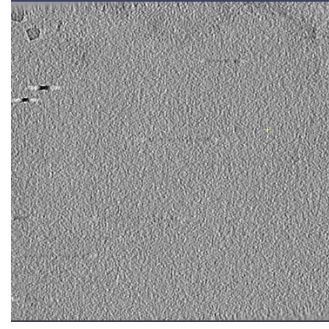

111

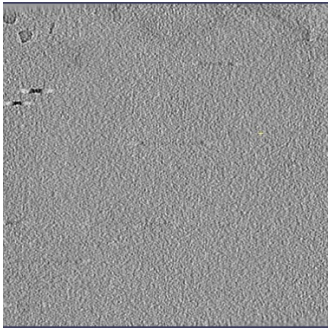

112

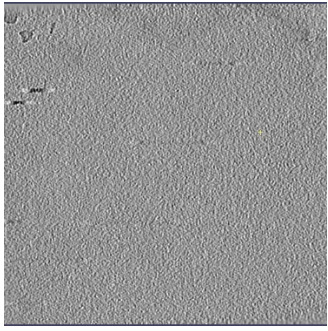

113

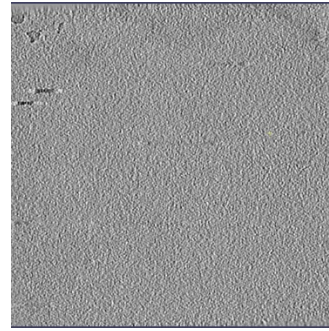

114

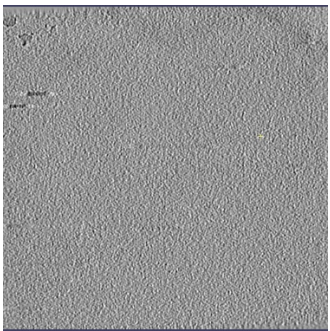

115

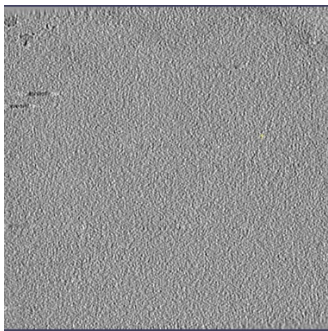

116

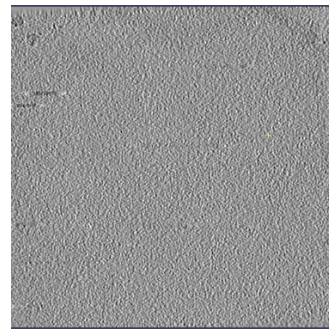

117

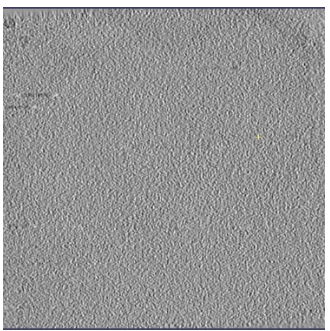

118

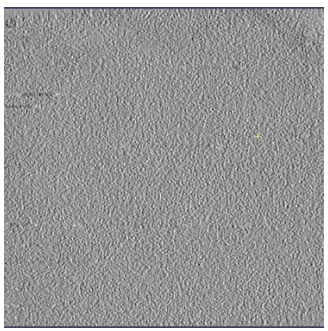

119

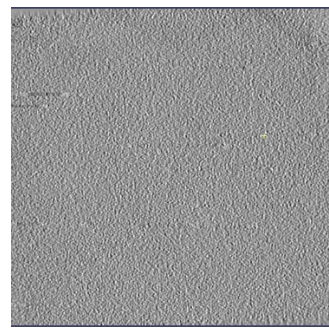

120

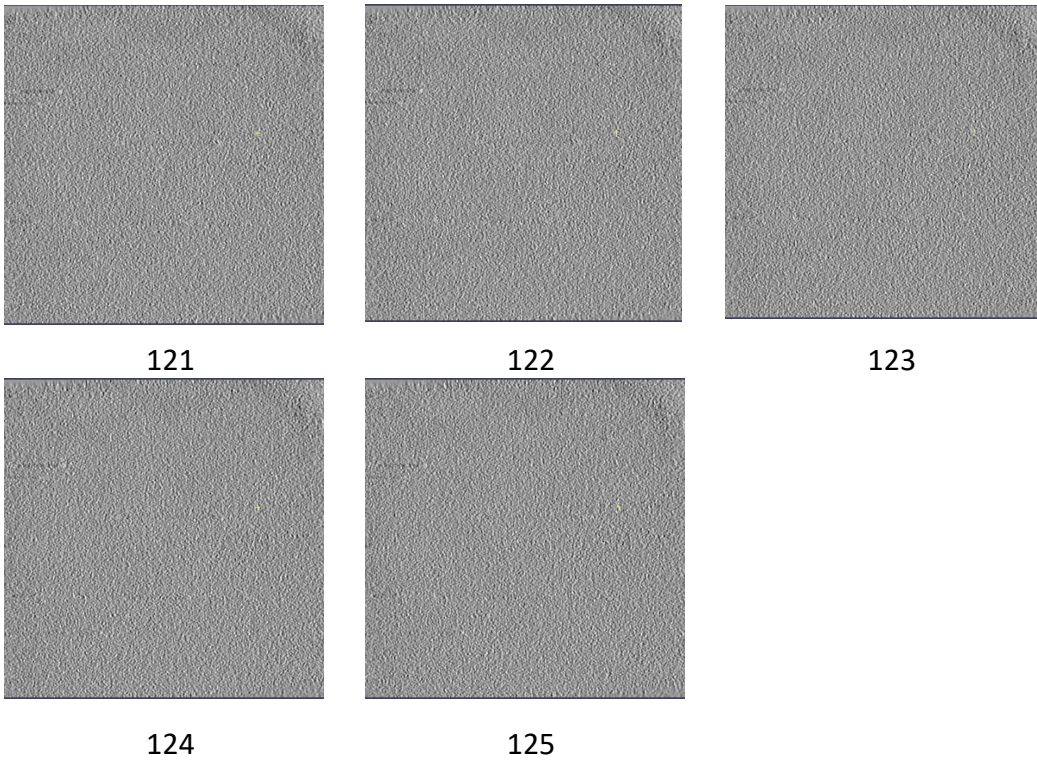

**Supplementary Figure 3.** TEM images showing the 3D tomographic volume slices of 10% corona coated NPs. The size of each image panel is 1 $\mu$ m

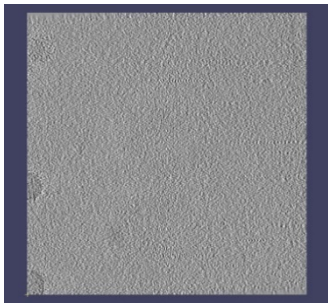

1

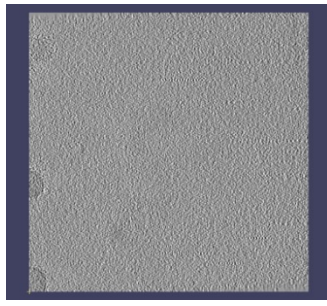

2

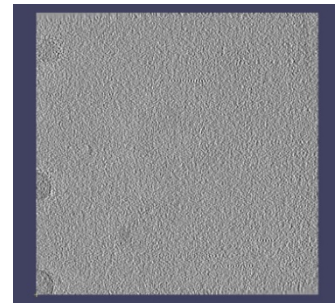

3

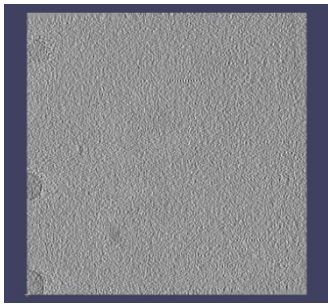

4

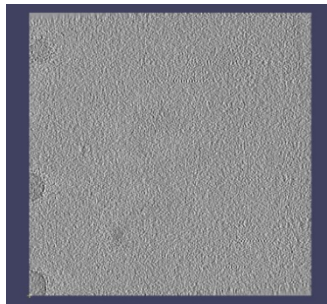

5

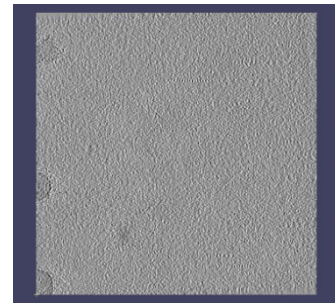

6

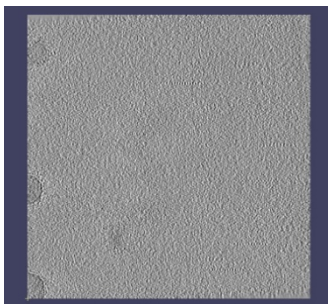

7

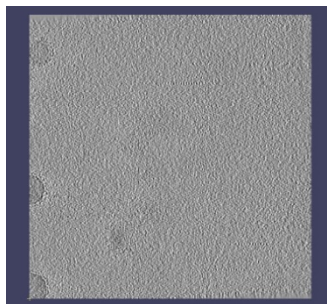

8

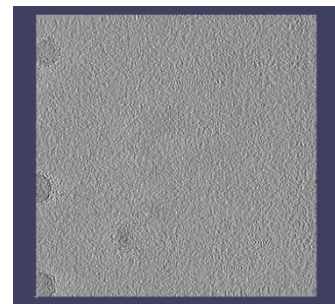

9

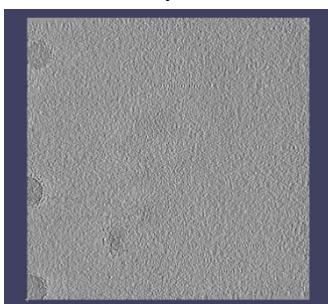

10

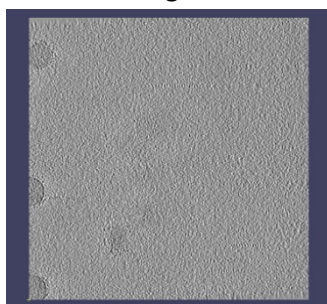

11

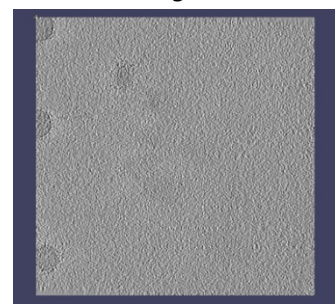

12

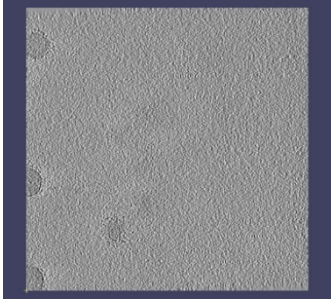

13

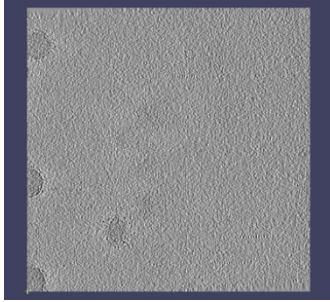

14

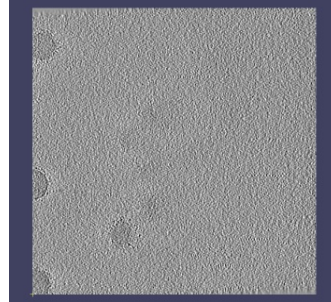

15

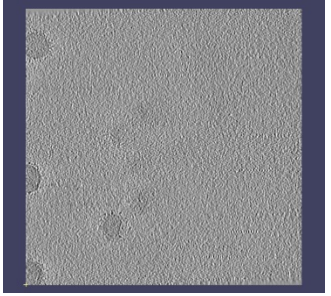

16

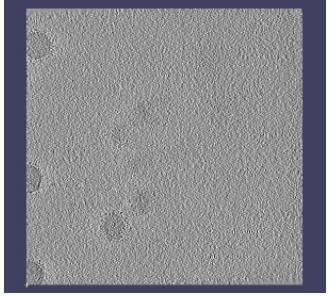

17

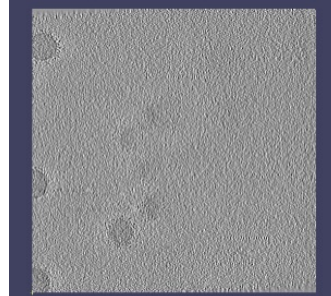

18

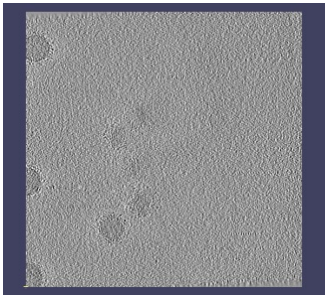

19

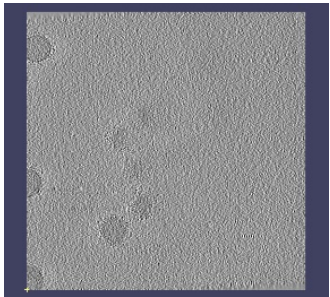

20

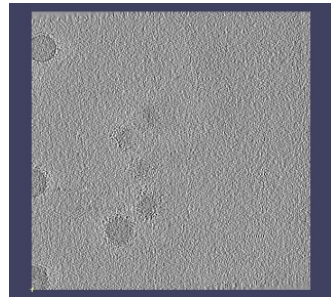

21

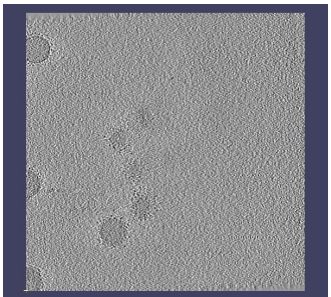

22

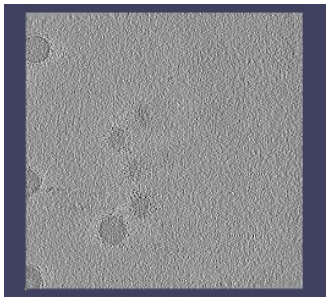

23

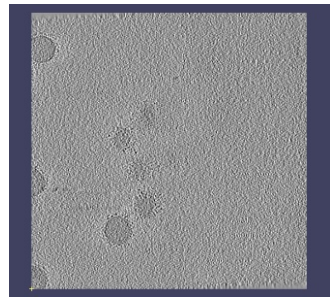

24

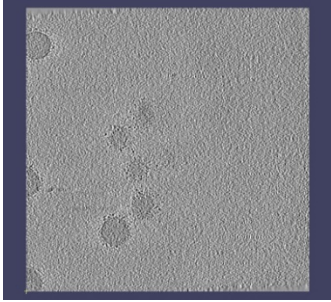

25

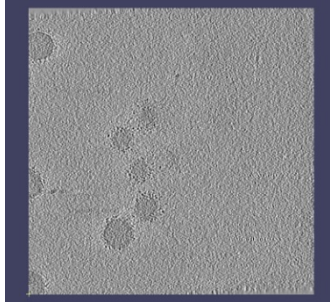

26

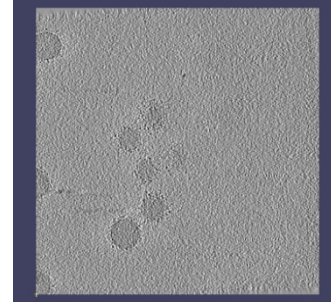

27

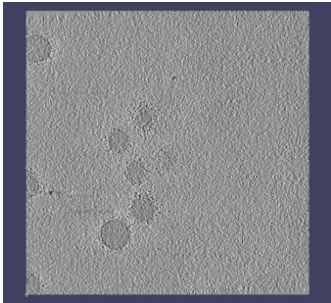

28

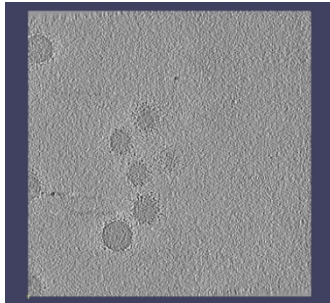

29

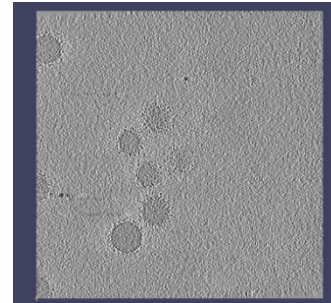

30

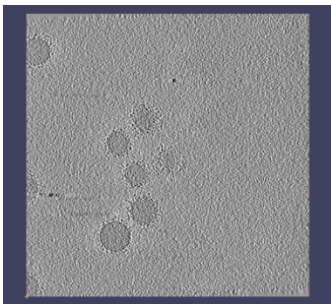

31

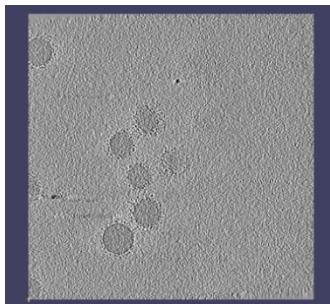

32

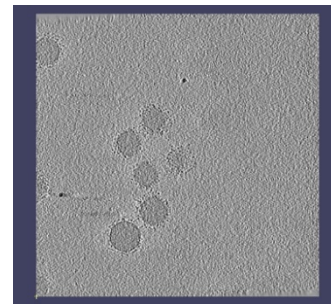

33

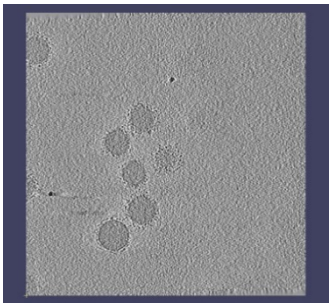

34

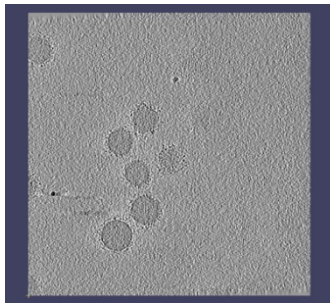

35

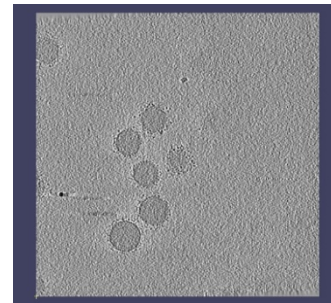

36



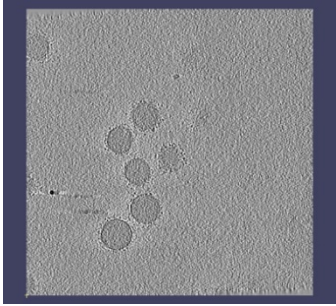

37

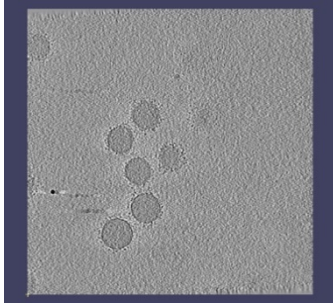

38

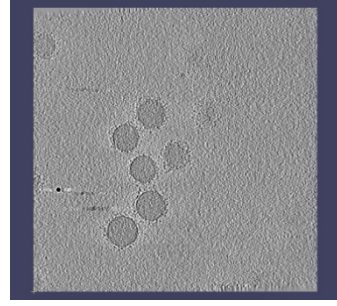

39

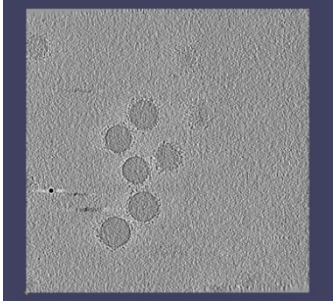

40

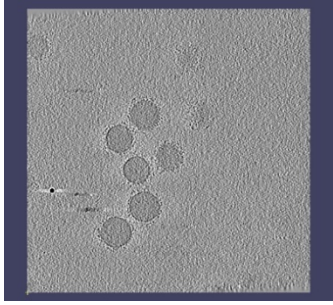

41

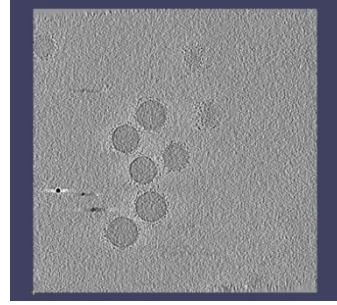

42

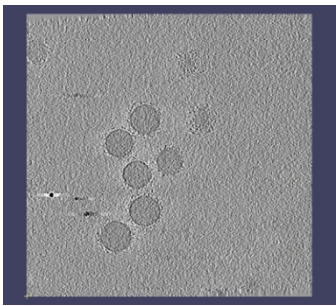

43

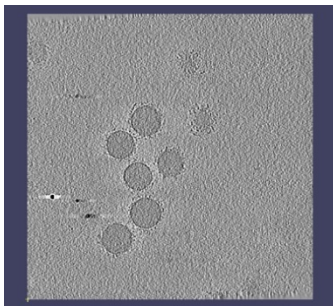

44

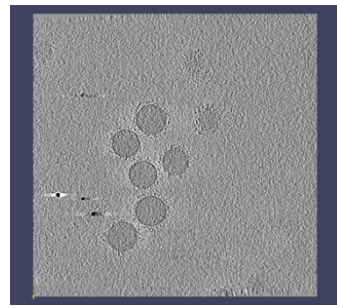

45

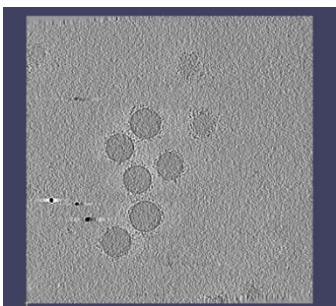

46

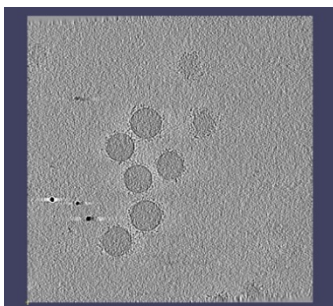

47

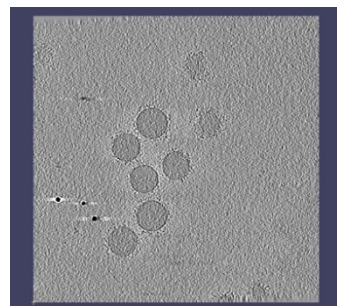

48

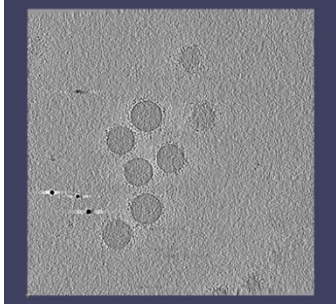

49

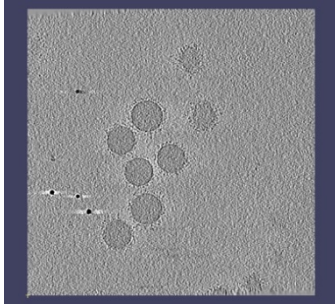

50

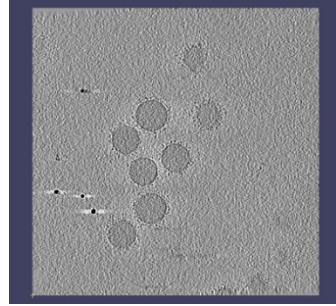

51

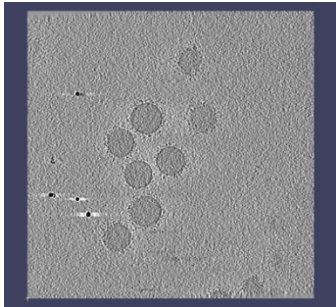

52

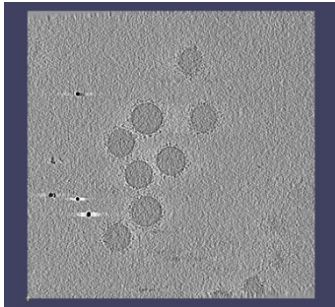

53

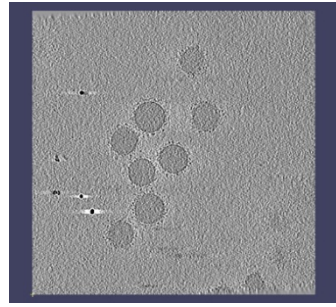

54

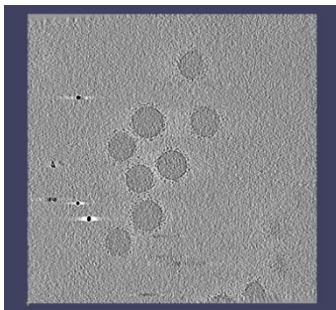

55

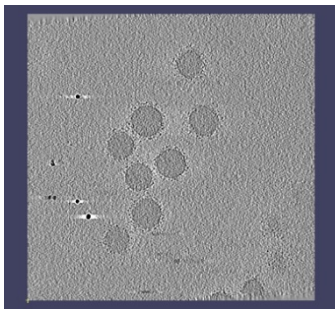

56

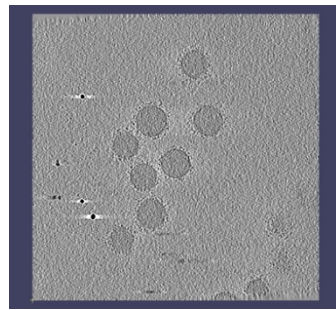

57

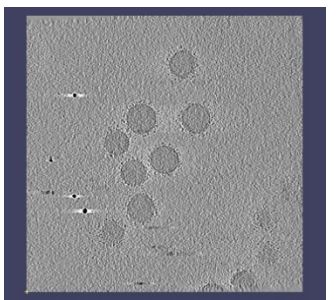

58

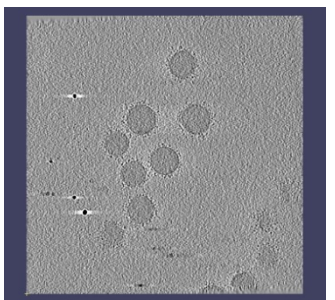

59

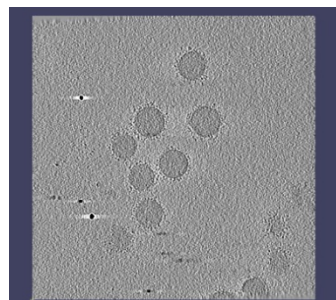

60

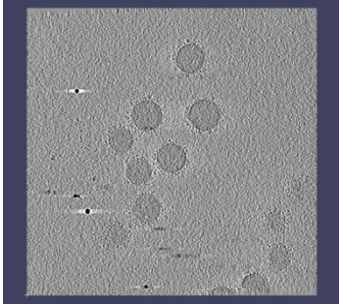

61

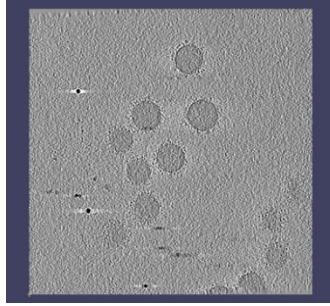

62

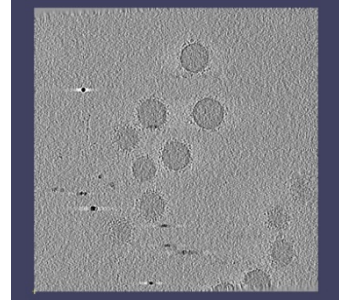

63

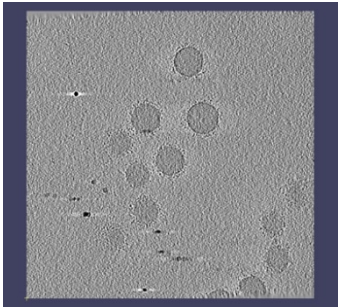

64

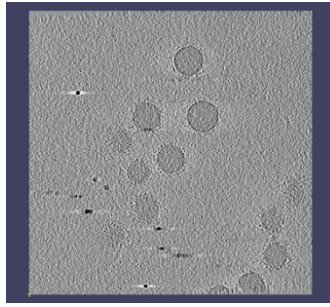

65

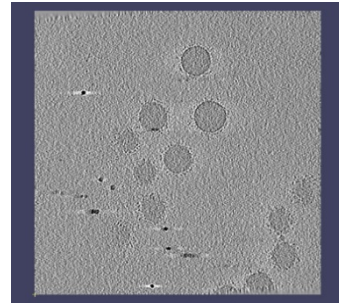

66

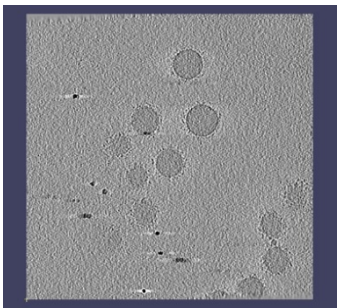

67

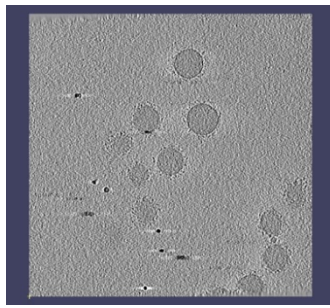

68

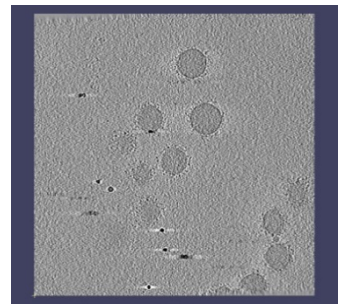

69

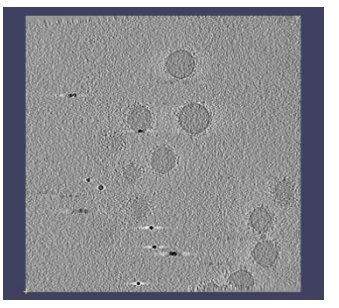

70

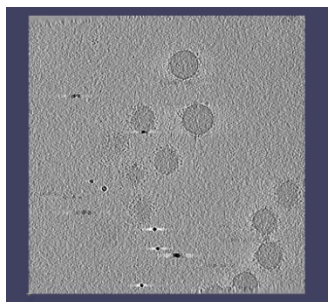

71

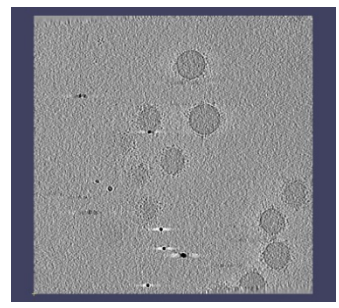

72

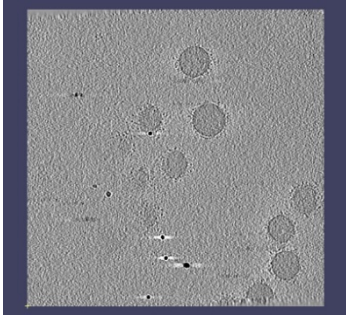

73

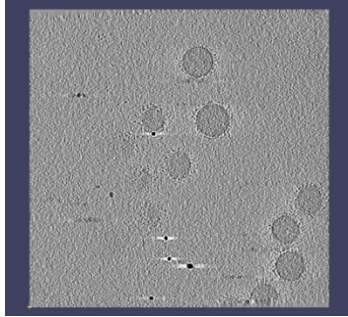

74

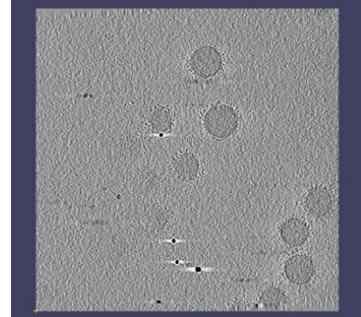

75

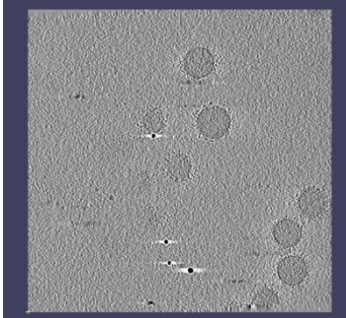

76

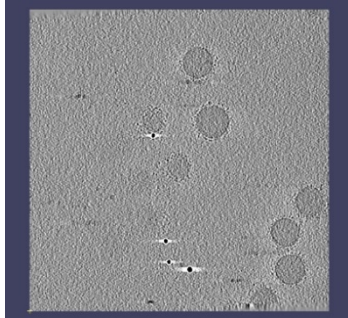

77

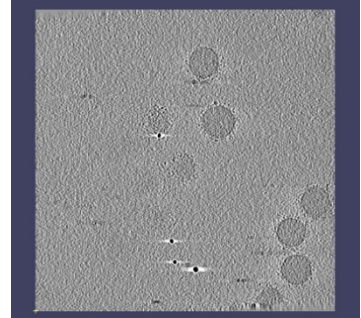

78

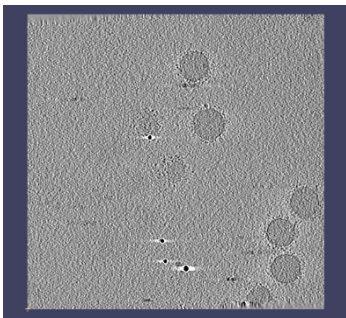

79

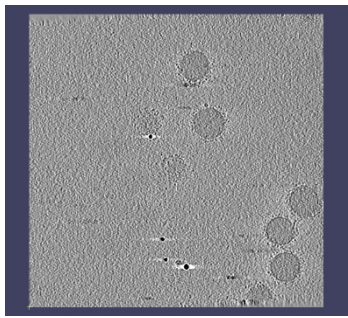

80

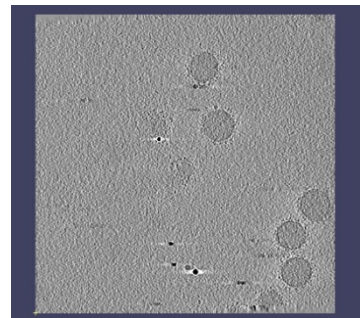

81

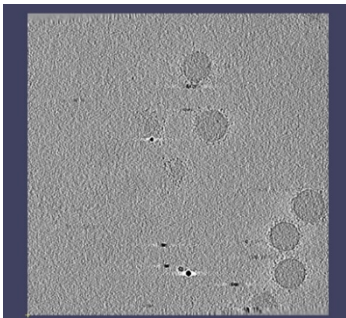

82

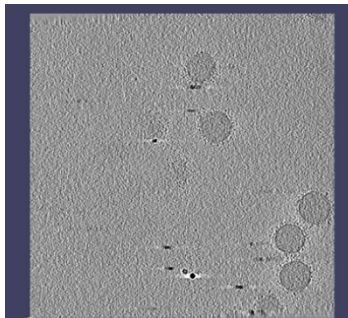

83

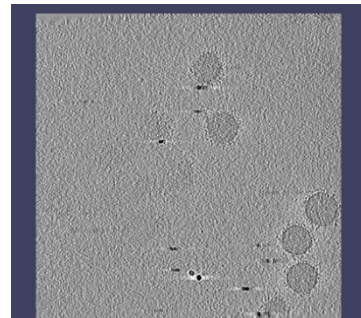

84

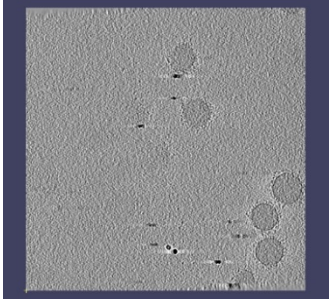

85

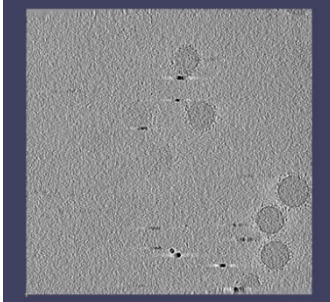

86

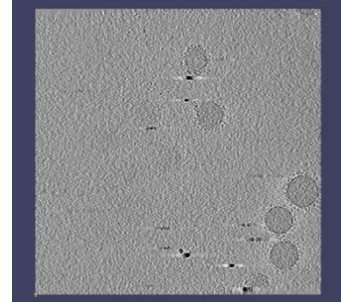

87

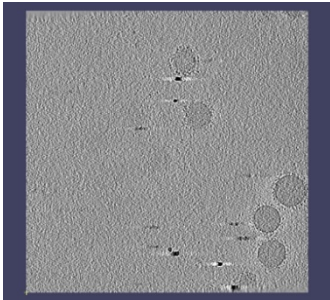

88

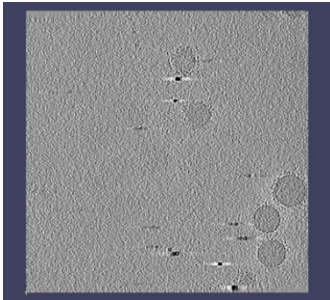

89

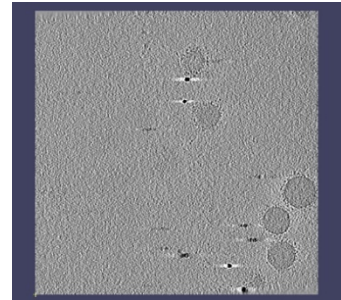

90

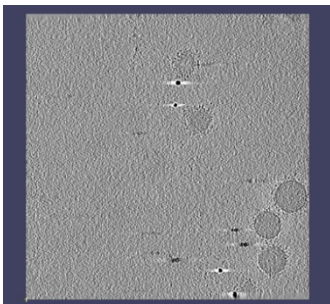

91

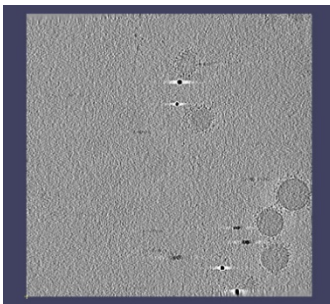

92

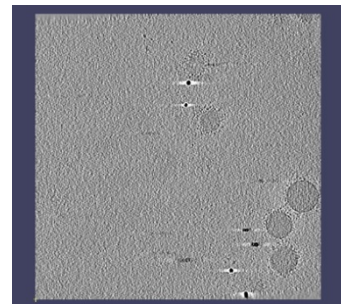

93

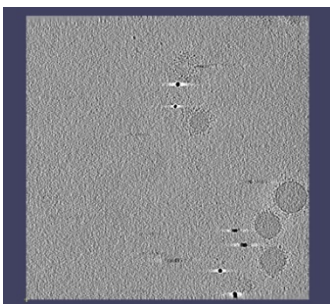

94

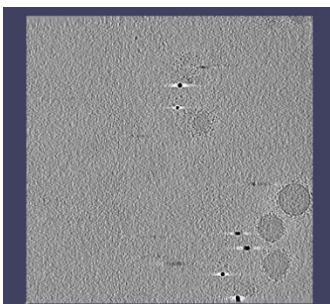

95

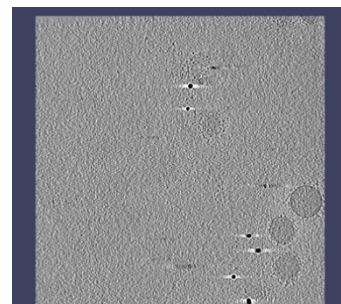

96

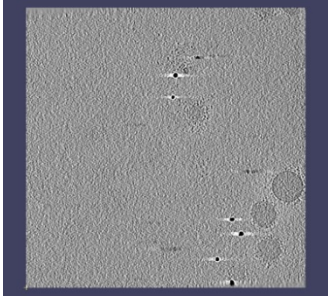

97

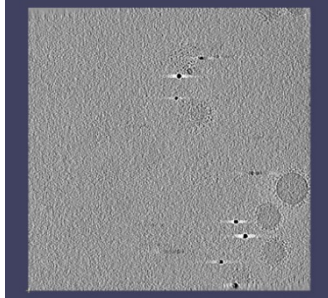

98

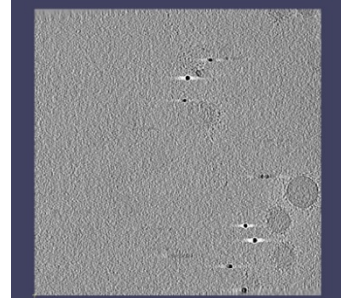

99

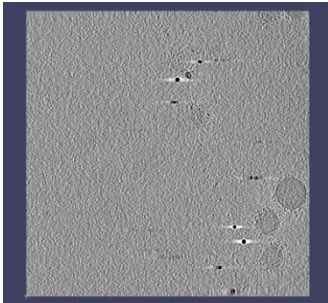

100

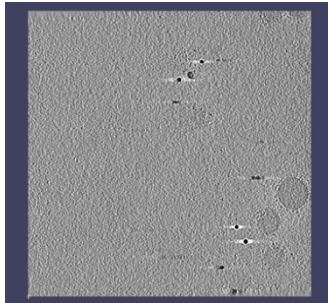

101

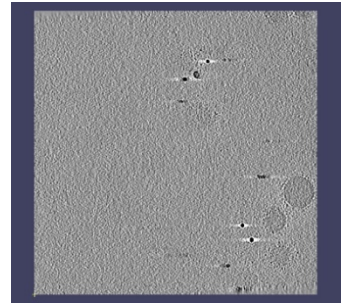

102

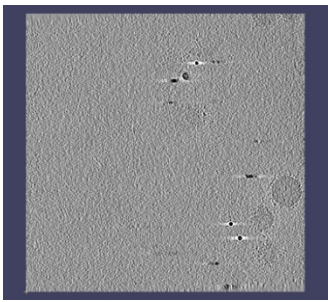

103

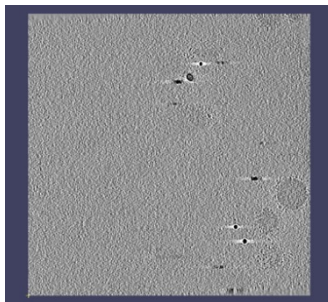

104

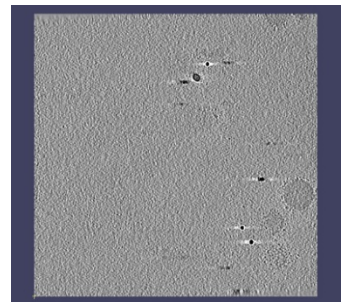

105

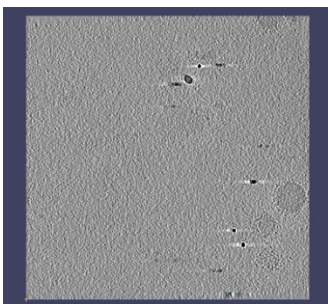

106

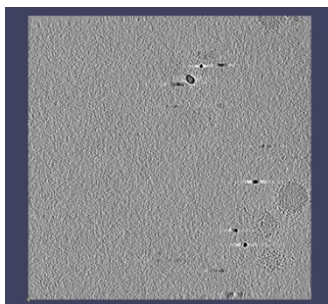

107

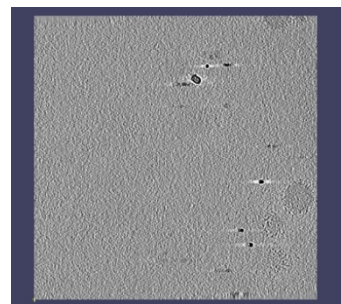

108

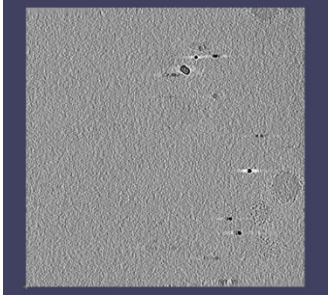

109

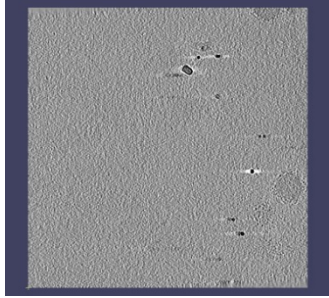

110

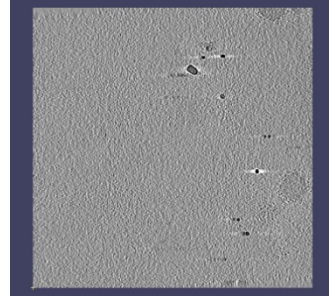

111

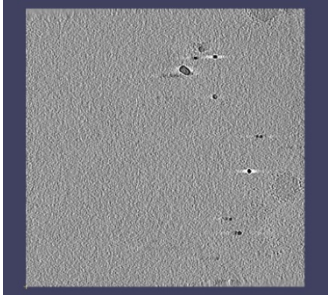

112

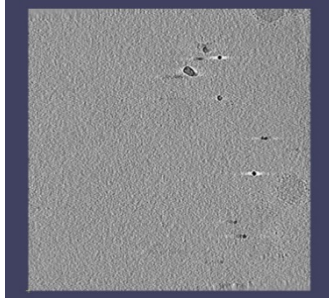

113

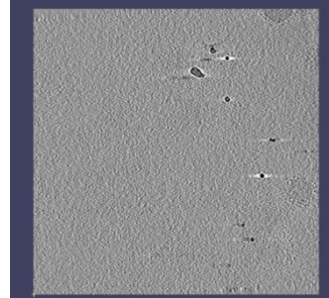

114

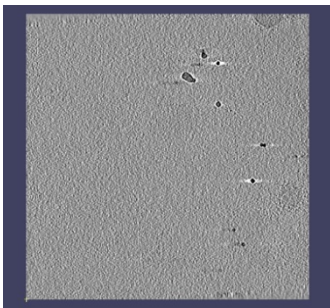

115

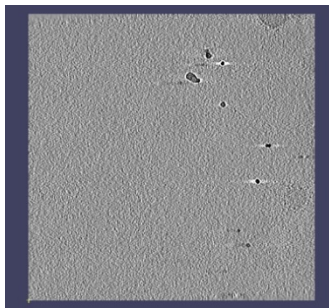

116

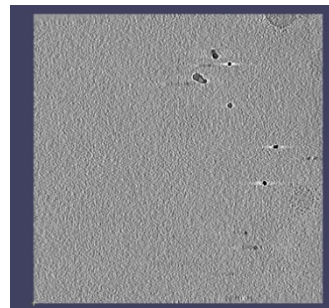

117

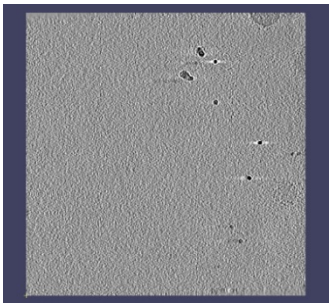

118

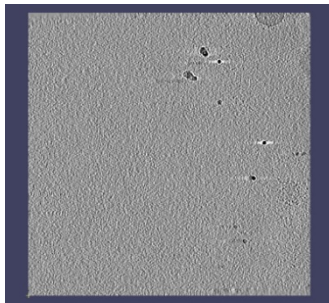

119

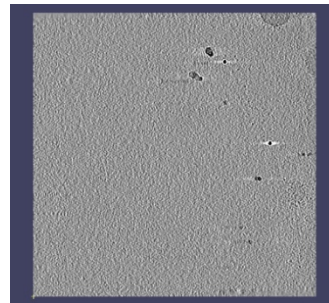

120

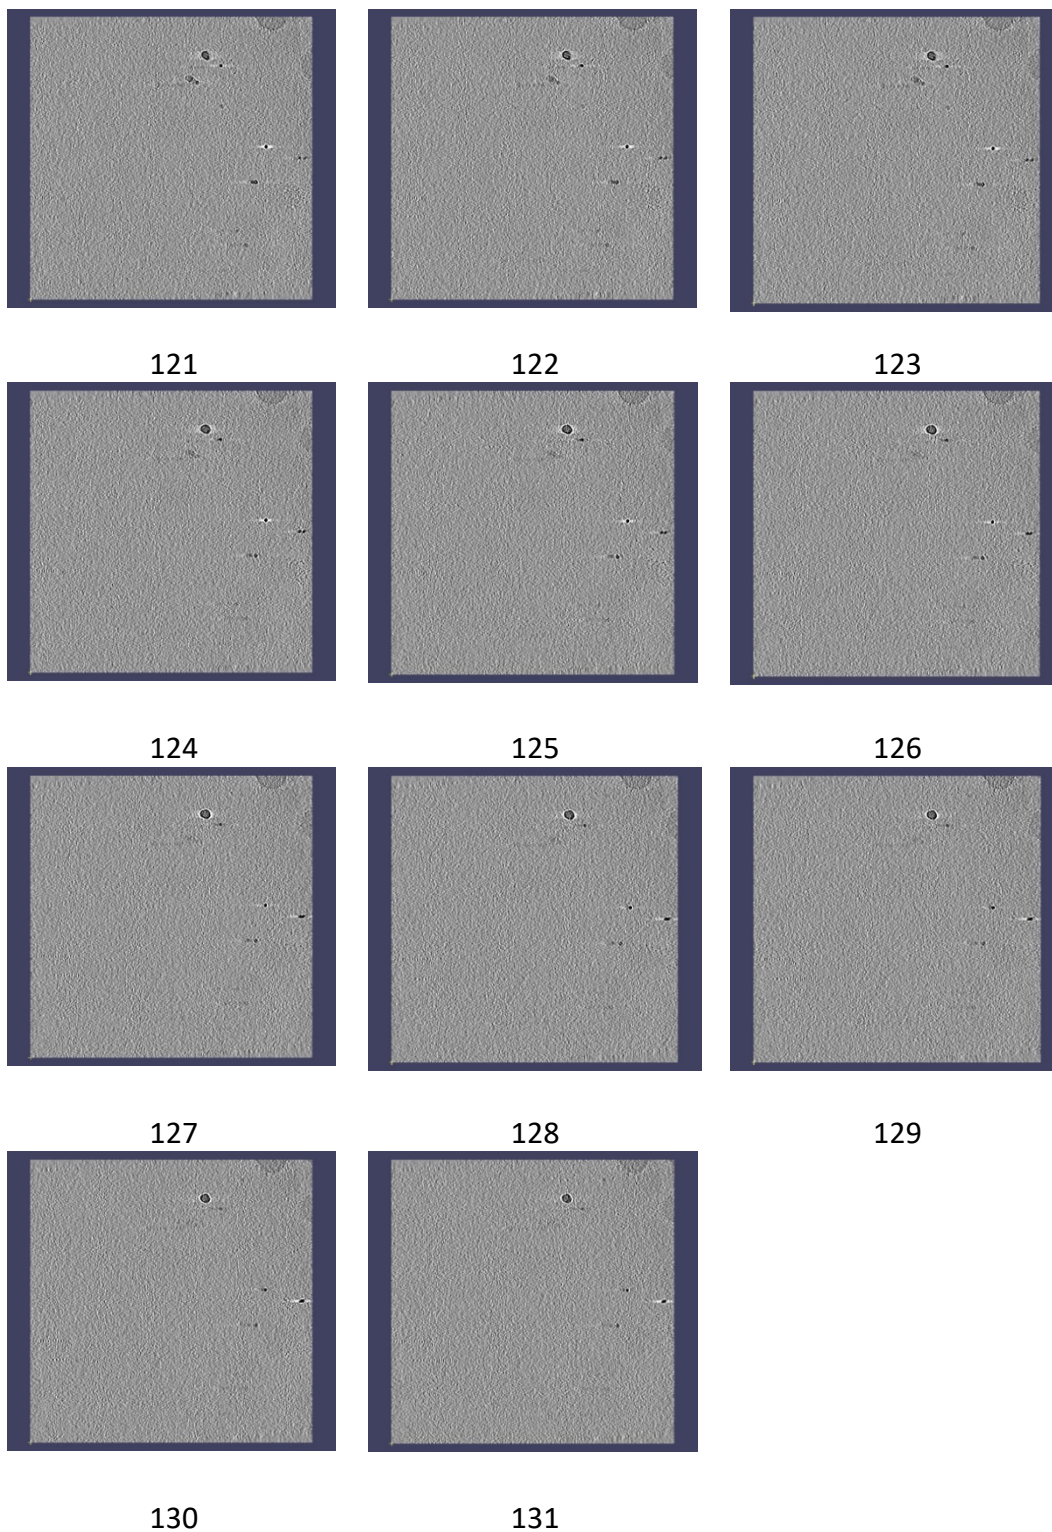

**Supplementary Figure 4.** TEM images showing the 3D tomographic volume slices of 50% corona coated NPs. The size of each image panel is 1 μm.
